# Supplementary material
Source: publisher figshare collection journal article supplement (https://plos.figshare.com/articles/dataset/_/141070)

**A**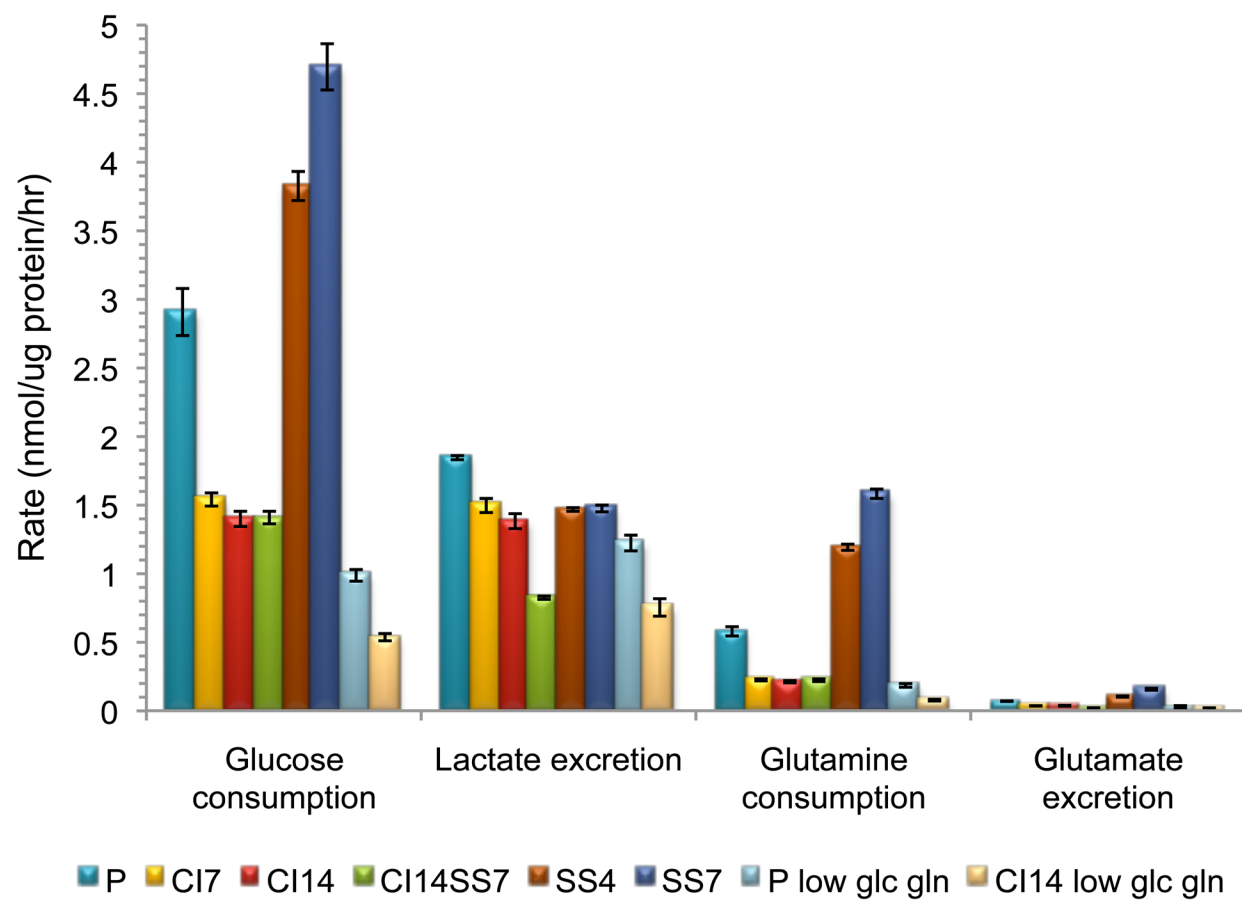

**B**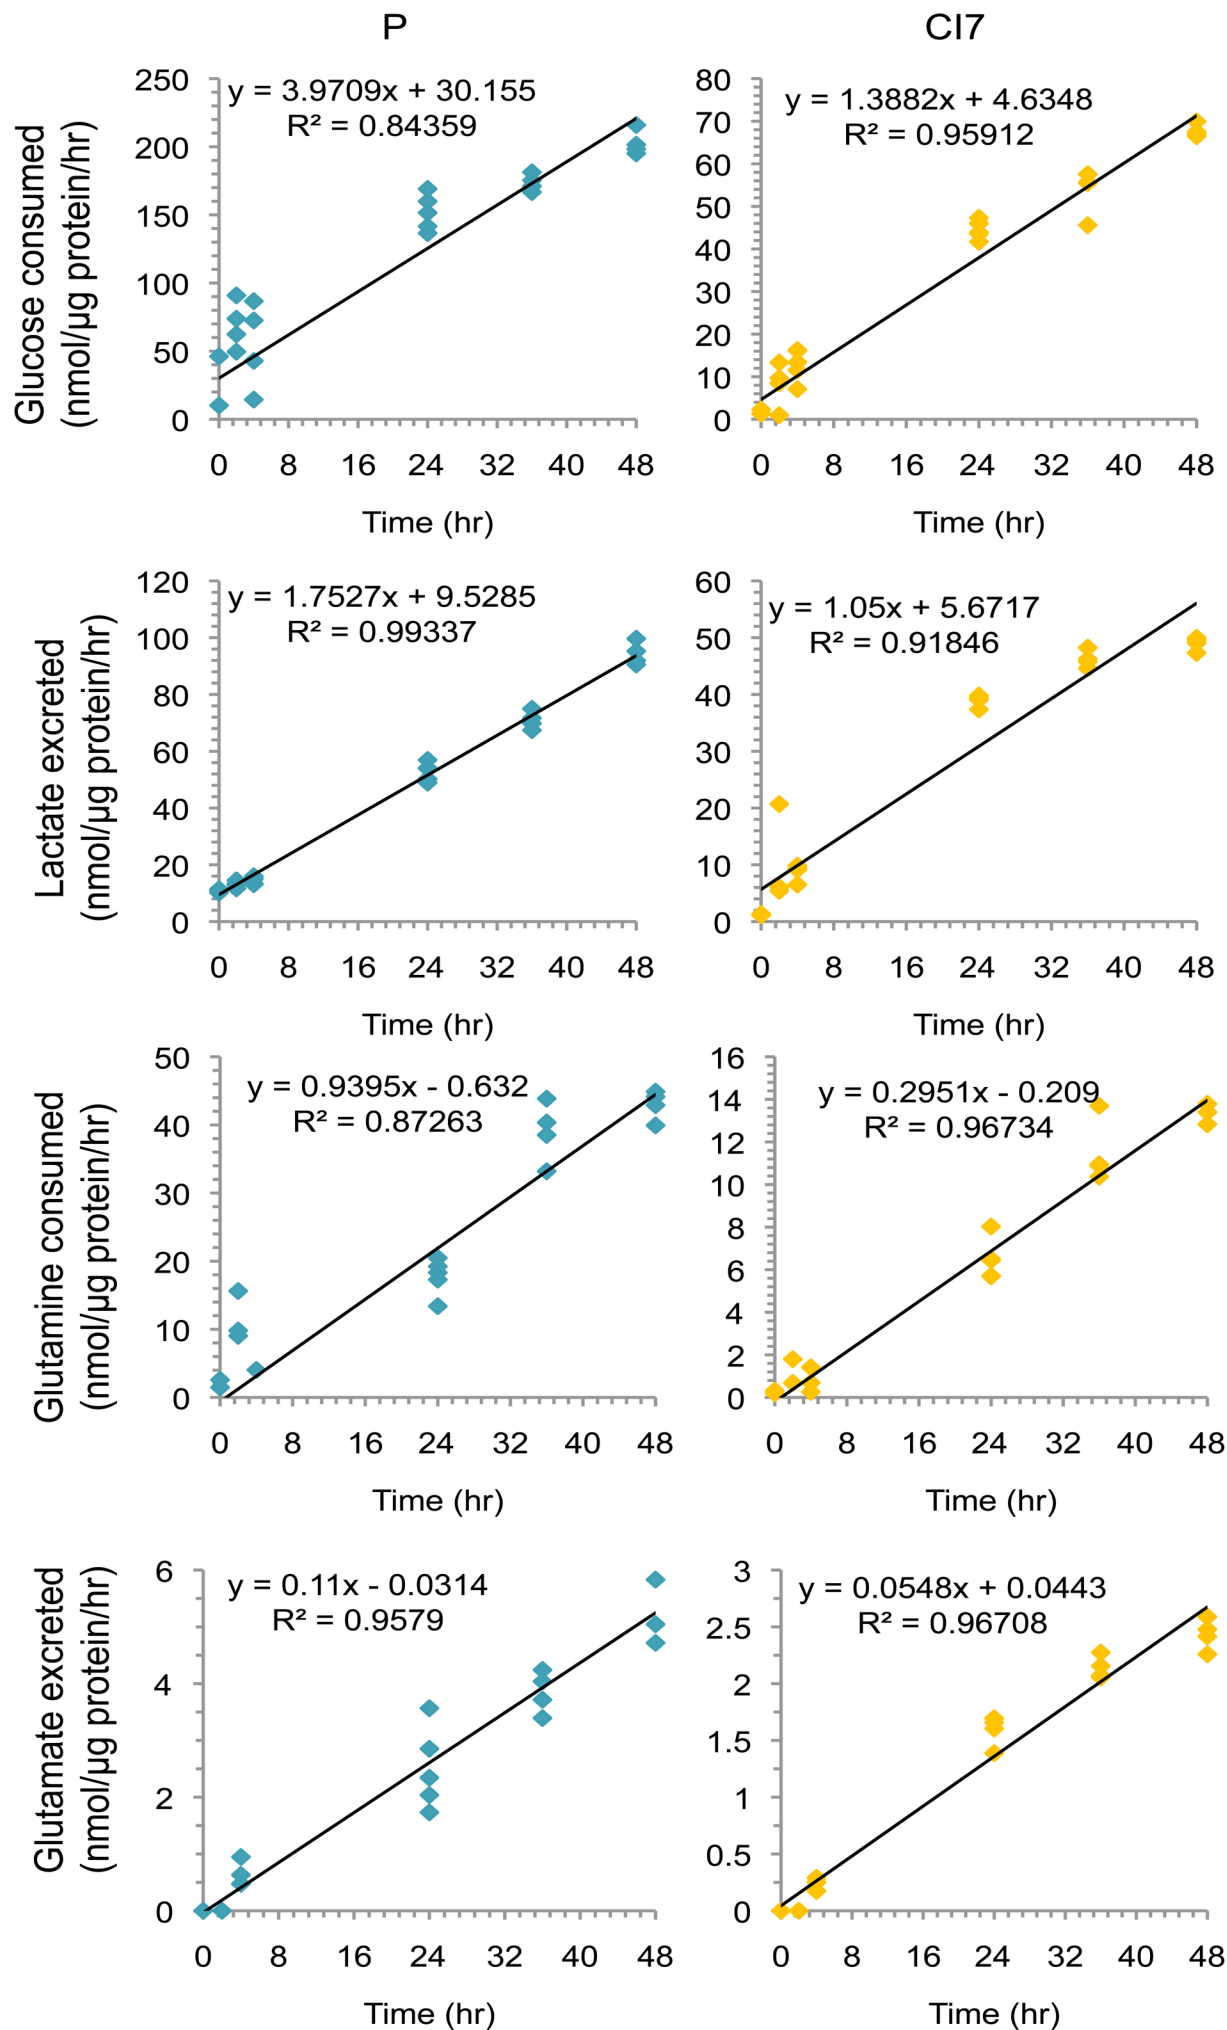

**C**

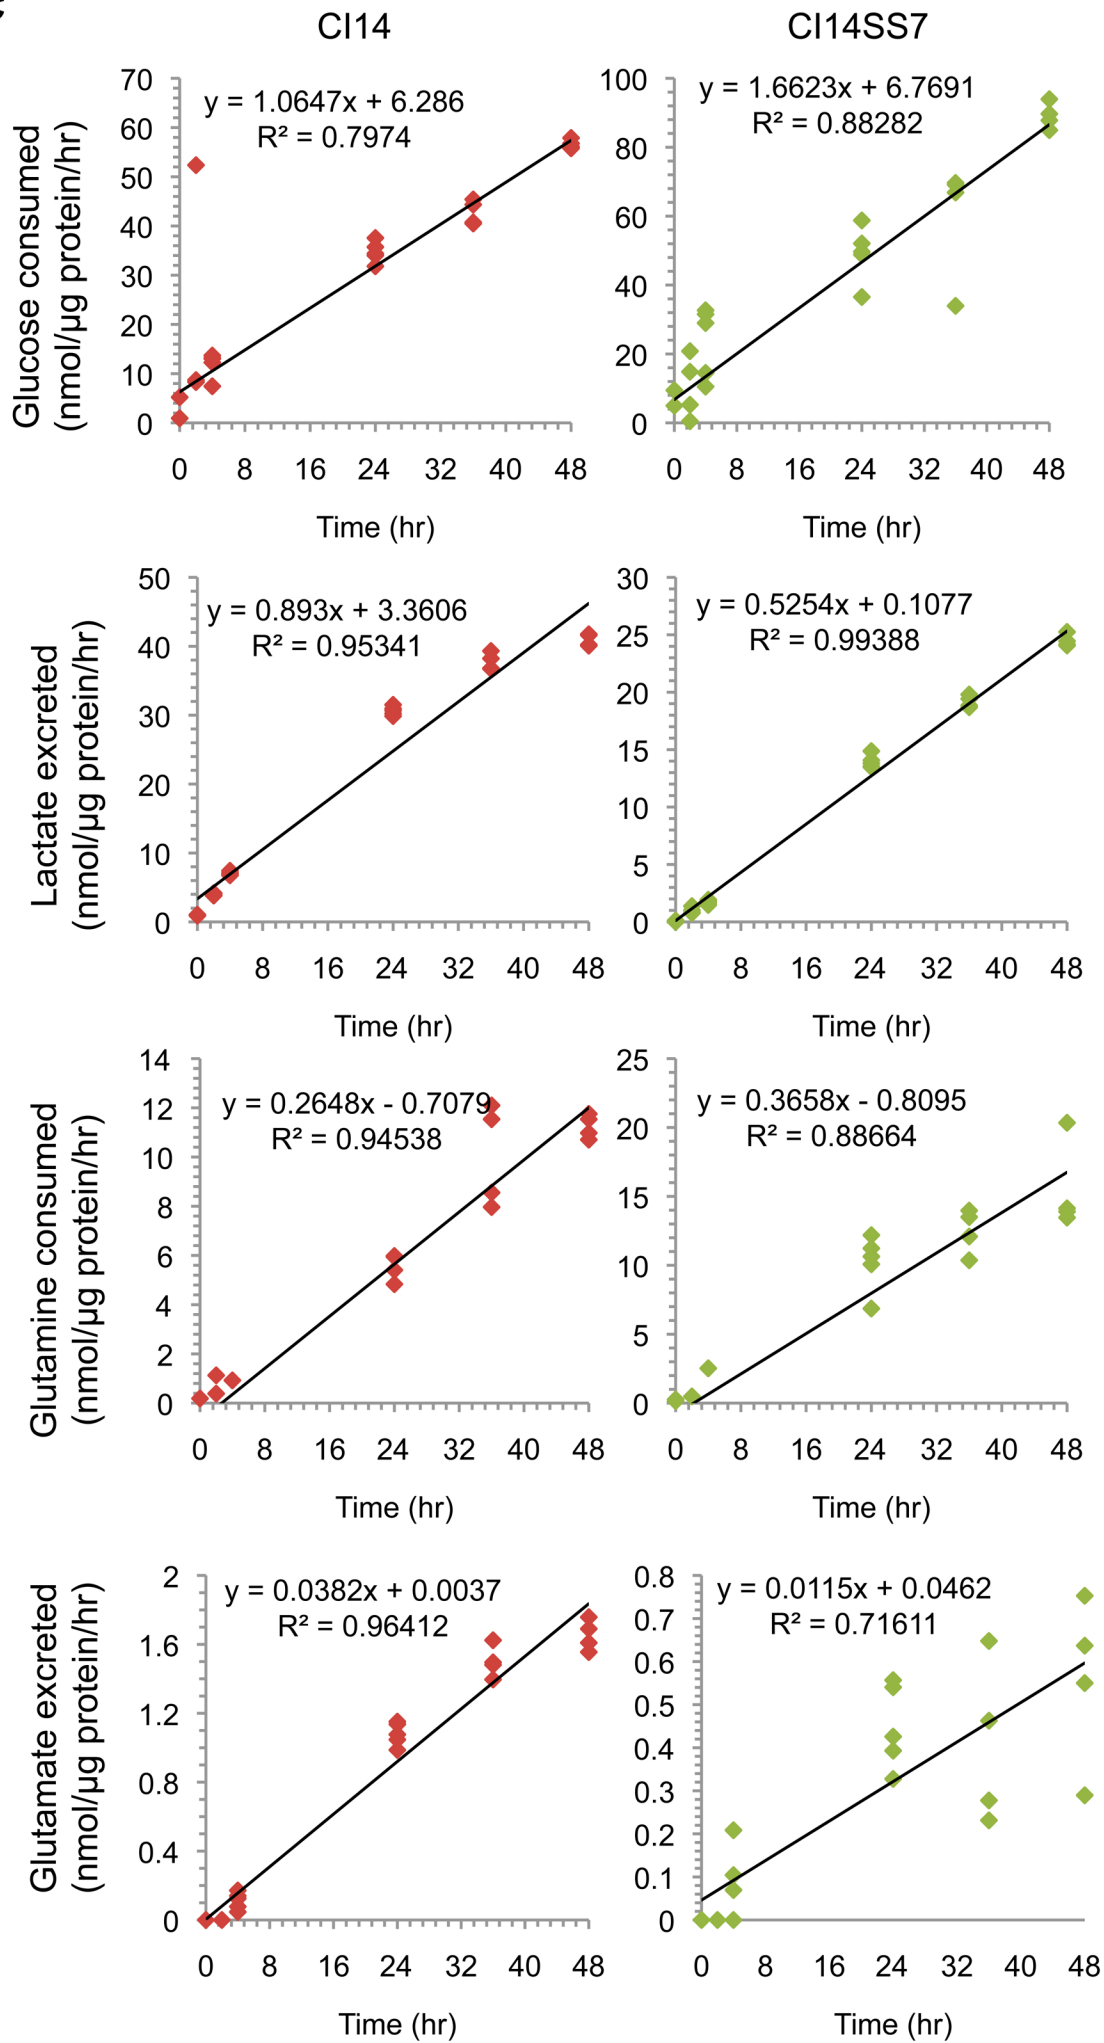

D

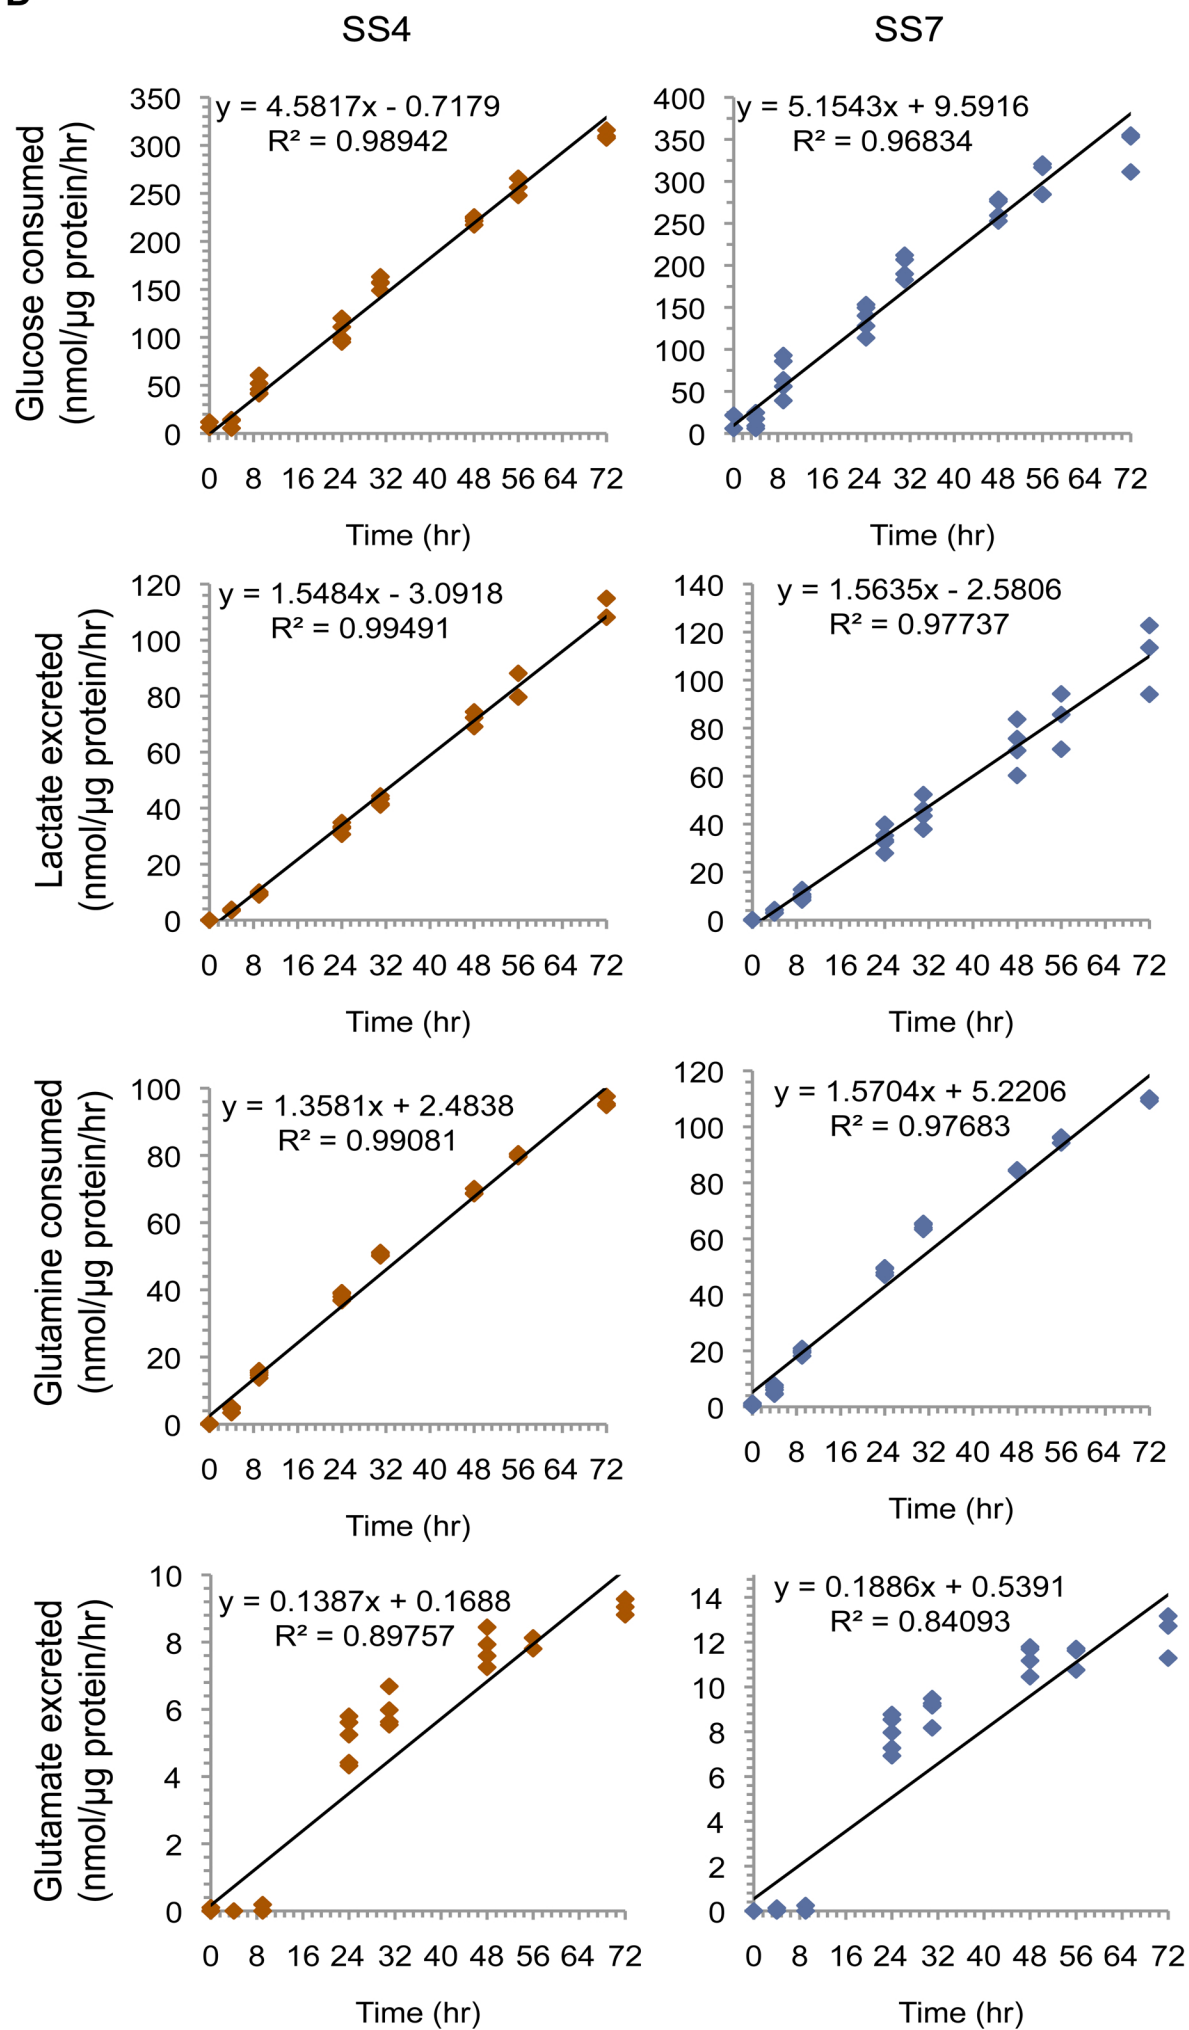

E

P Low Gluc Low Gln

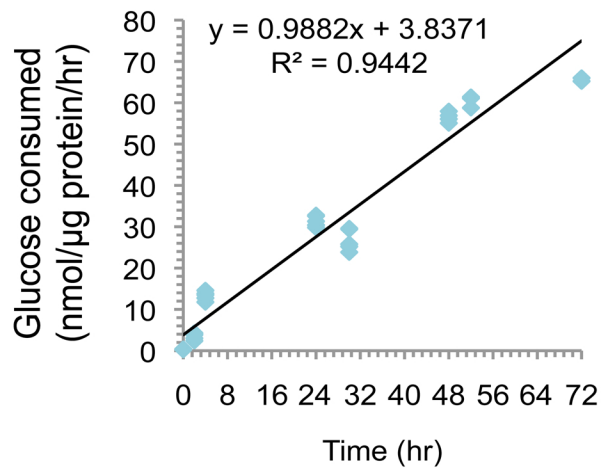

C14 Low Gluc Low Gln

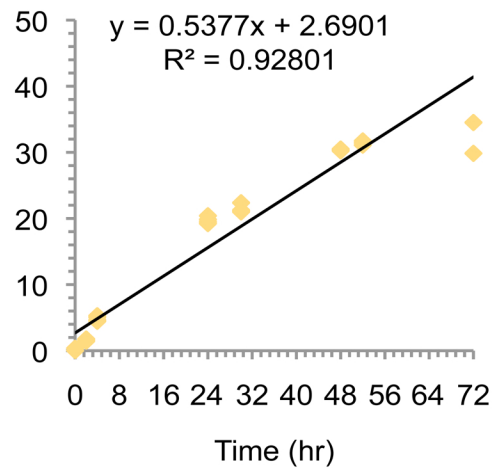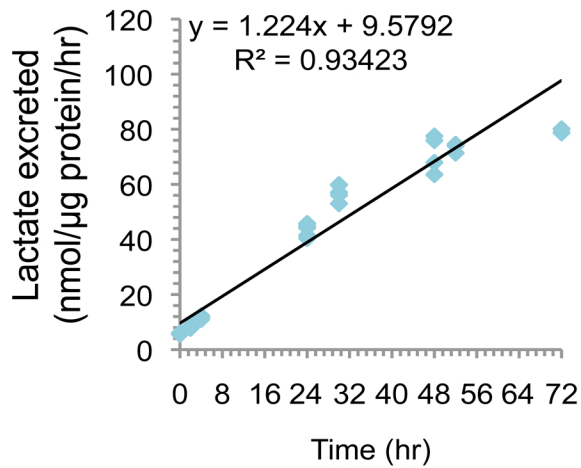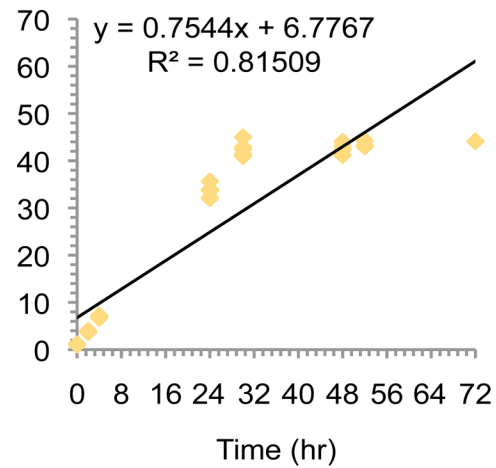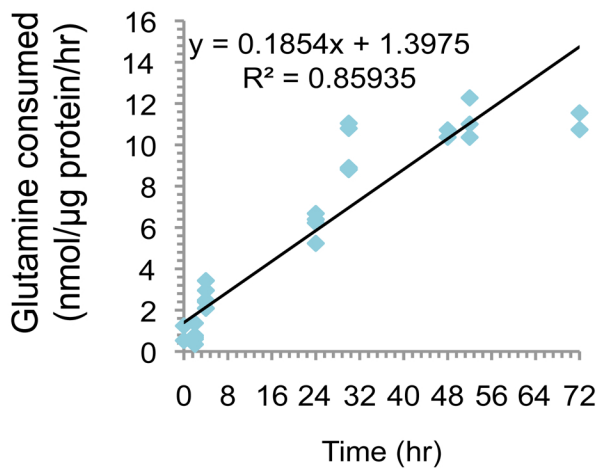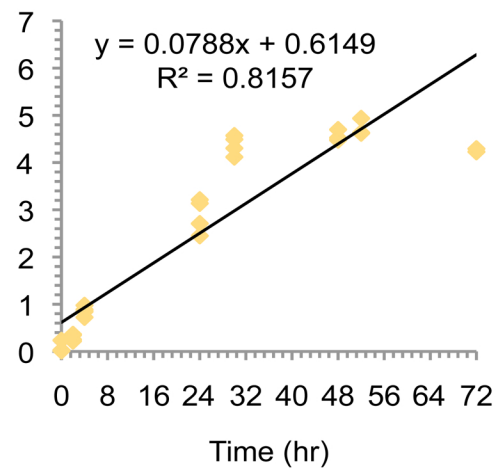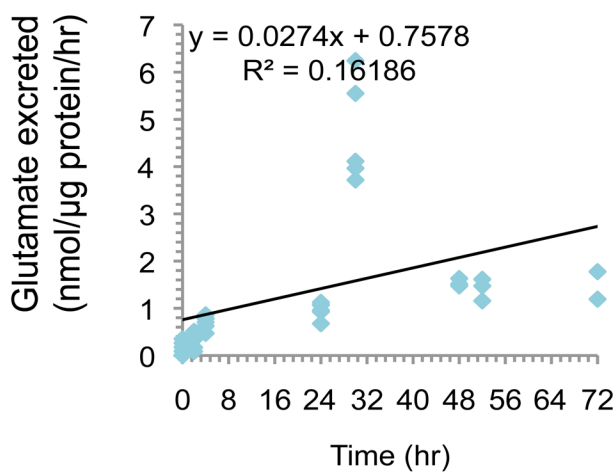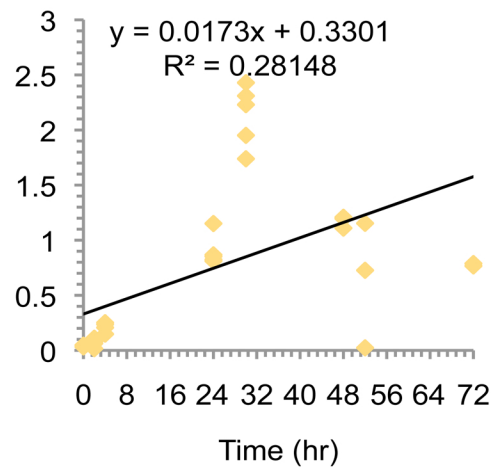

Supplement: Supplementary file [file 1]
